# Supplementary material
Source: PubMed Central journal article supplement (PMC8091910)
Supplement: NIHMS1688943-supplement-Supplemental_table_S1.pdf [file NIHMS1688943-supplement-Supplemental_table_S1.pdf]

## Supplemental table S1

| <b>ROSETTA CODE</b> | <b>AMBER CODE</b> | <b>NAME</b>                    |
|---------------------|-------------------|--------------------------------|
| A20                 | 2AG               | 2-allyl-glycine                |
| A33                 | AHP               | 2-amino-heptanoic acid         |
| A44                 | IGL               | 2-indanyl-glycine_puck1        |
| A45                 | IGL               | 2-indanyl-glycine              |
| A48                 | MFO               | 2-methyl-phenylalanine         |
| A69                 | TY2               | 3-amino-tyrosine               |
| A84                 | TMB               | 3-methyl-biphenylalanine       |
| ABA                 | ABA               | 2-Aminobutyric acid            |
| APA                 | HOX               | 4-amino-phenylalanine          |
| B21                 | D4P               | 4-hydroxy-phenylglycine        |
| B27                 | 4PH               | 4-methyl-phenylalanine         |
| B30                 | BFA               | Biphenylalanine                |
| B31                 | TP4               | 4-tert-butyl-phenylalanine     |
| B36                 | HRP               | 5-hydroxytryptophan            |
| B38                 | TR6               | 6-methyl-tryptophan            |
| B40                 | MTR               | 5-methyl-tryptophan            |
| B44                 | ANT               | 3-(9-anthryl)-alanine          |
| B47                 | IIL               | allo-isoleucine                |
| B53                 | DAB               | diaminobutyric_acid            |
| B57                 | RML               | (R)-alpha-methylleucine        |
| B58                 | MPH               | (R)-alpha-methyl-phenylalanine |
| B67                 | ALN               | 1-naphthylalanine              |
| B74                 | NAL               | 2-naphthylalanine              |
| B96                 | DIF               | 3,3-diphenylalanine            |
| B99                 | ALC               | Cyclohexylalanine              |
| C01                 | CP3               | 3-cyclopentylalanine           |
| C04                 | VAH               | Hydroxynorvaline               |
| C20                 | ESC               | Ethionine                      |
| C27                 | HPE               | homophenylalanine              |
| C30                 | HSE               | homoserine                     |
| C36                 | OMW               | 1-methyltryptophan             |
| C42                 | 004               | phenylglycine                  |
| C43                 | BB8               | phenyl-serine                  |
| C55                 | BUG               | t-butyl-leucine                |
| F30                 | HSE               | homoserine                     |
| mpa                 | 4PH               | 4-methylphenylalanine          |
| NLU                 | NLE               | Norleucine                     |
| NVL                 | NVA               | norvaline                      |

Table S1. Rosetta–Amber non-canonical amino acid code conversion table
