# Supplementary material
Source: PubMed Central journal article supplement (PMC8091910)

# Supplemental Figure S1

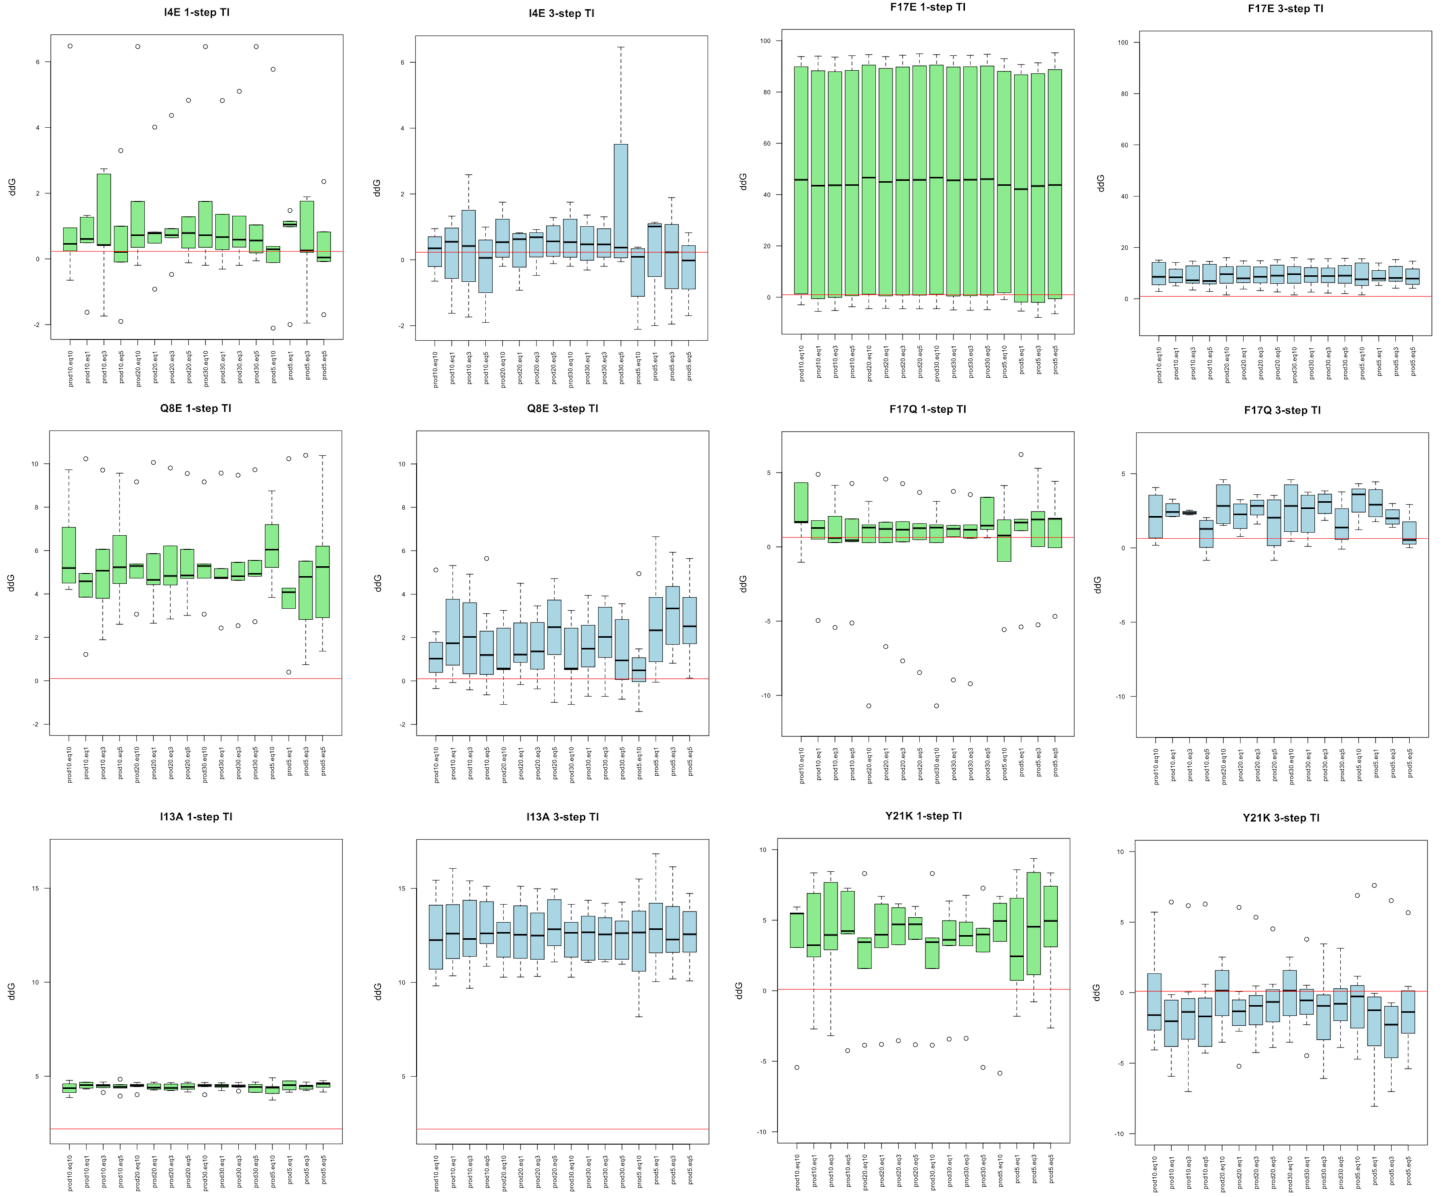

Supplement: NIHMS1688943-supplement-Supplemental_figure_S1.pdf [file NIHMS1688943-supplement-Supplemental_figure_S1.pdf]

# Supplemental Figure S2

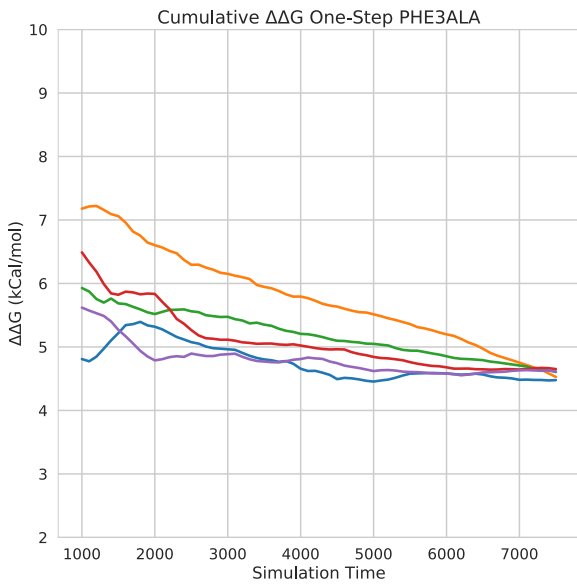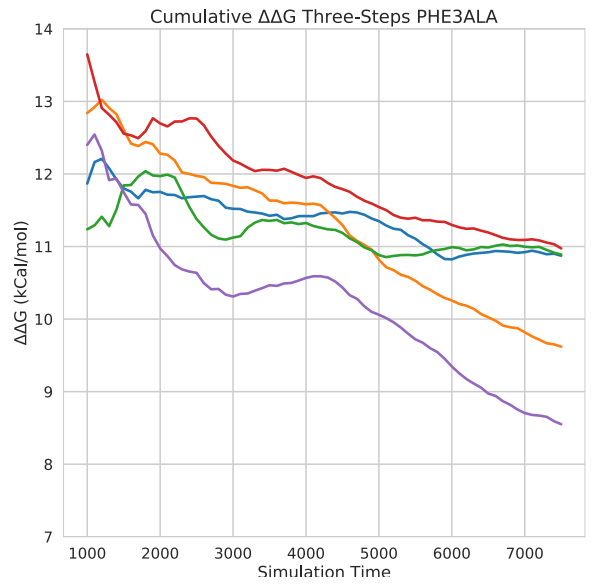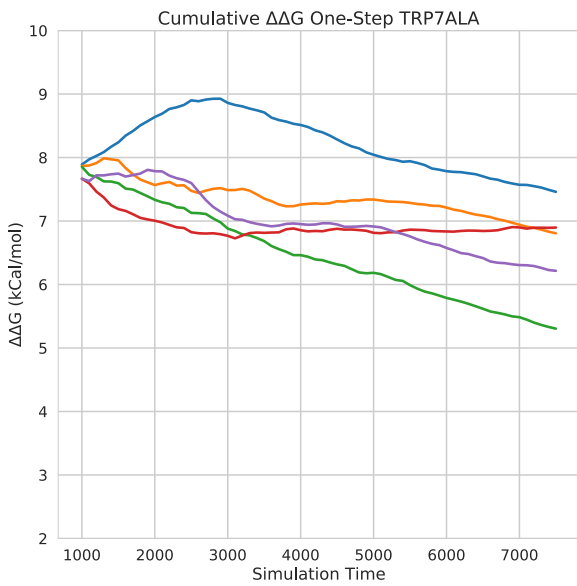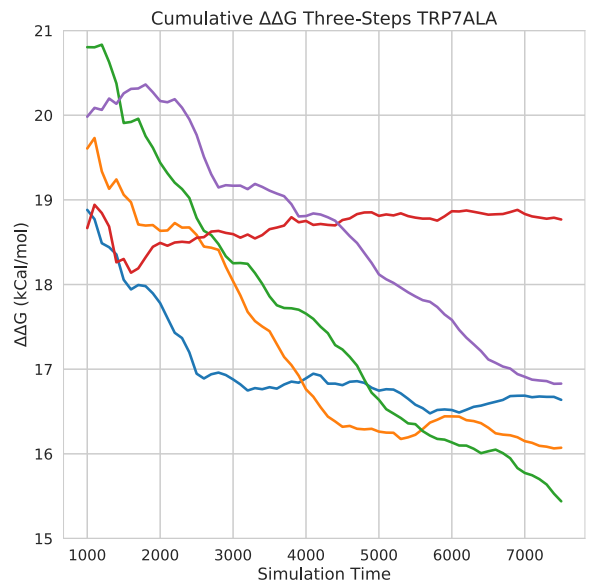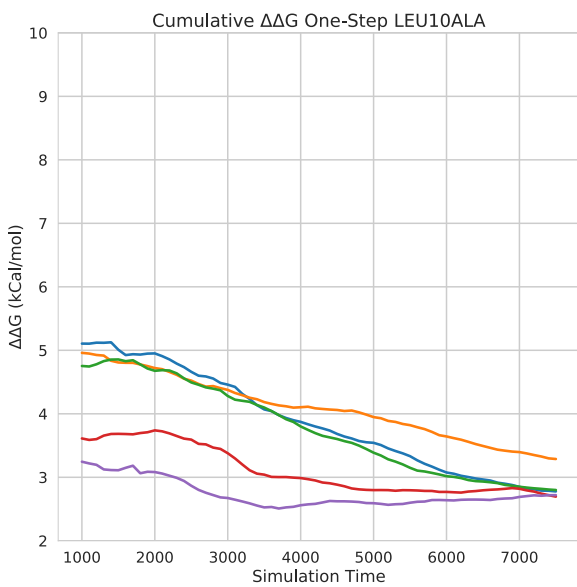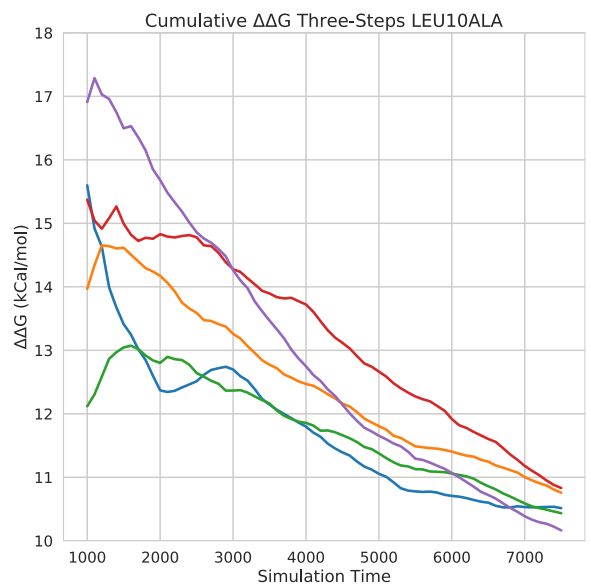

Supplement: NIHMS1688943-supplement-Supplemental_figure_S2.pdf [file NIHMS1688943-supplement-Supplemental_figure_S2.pdf]

Supplemental Figure S3

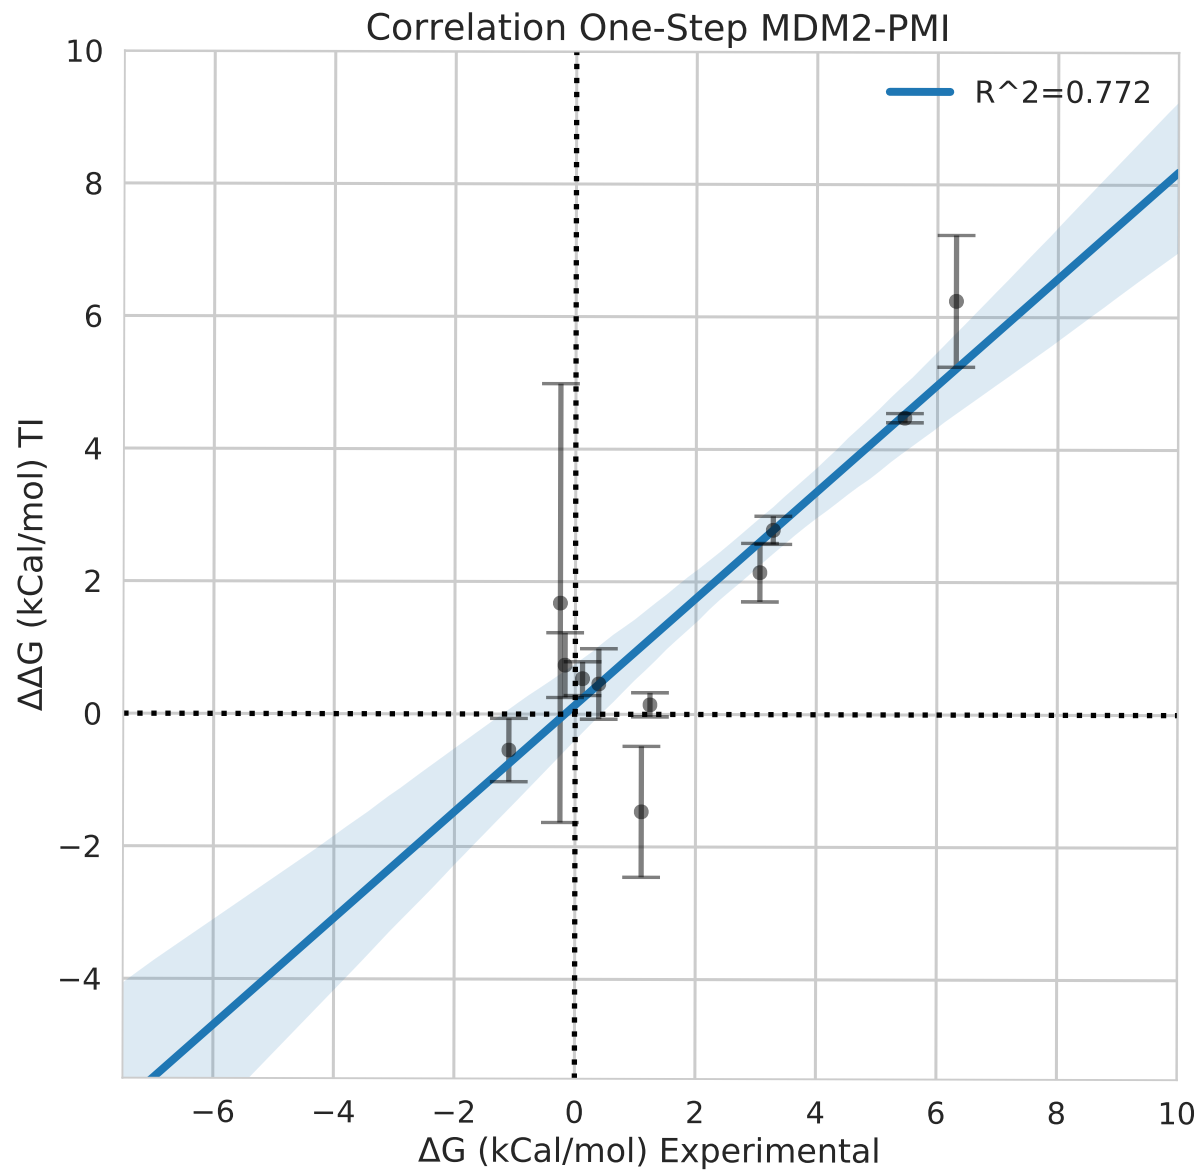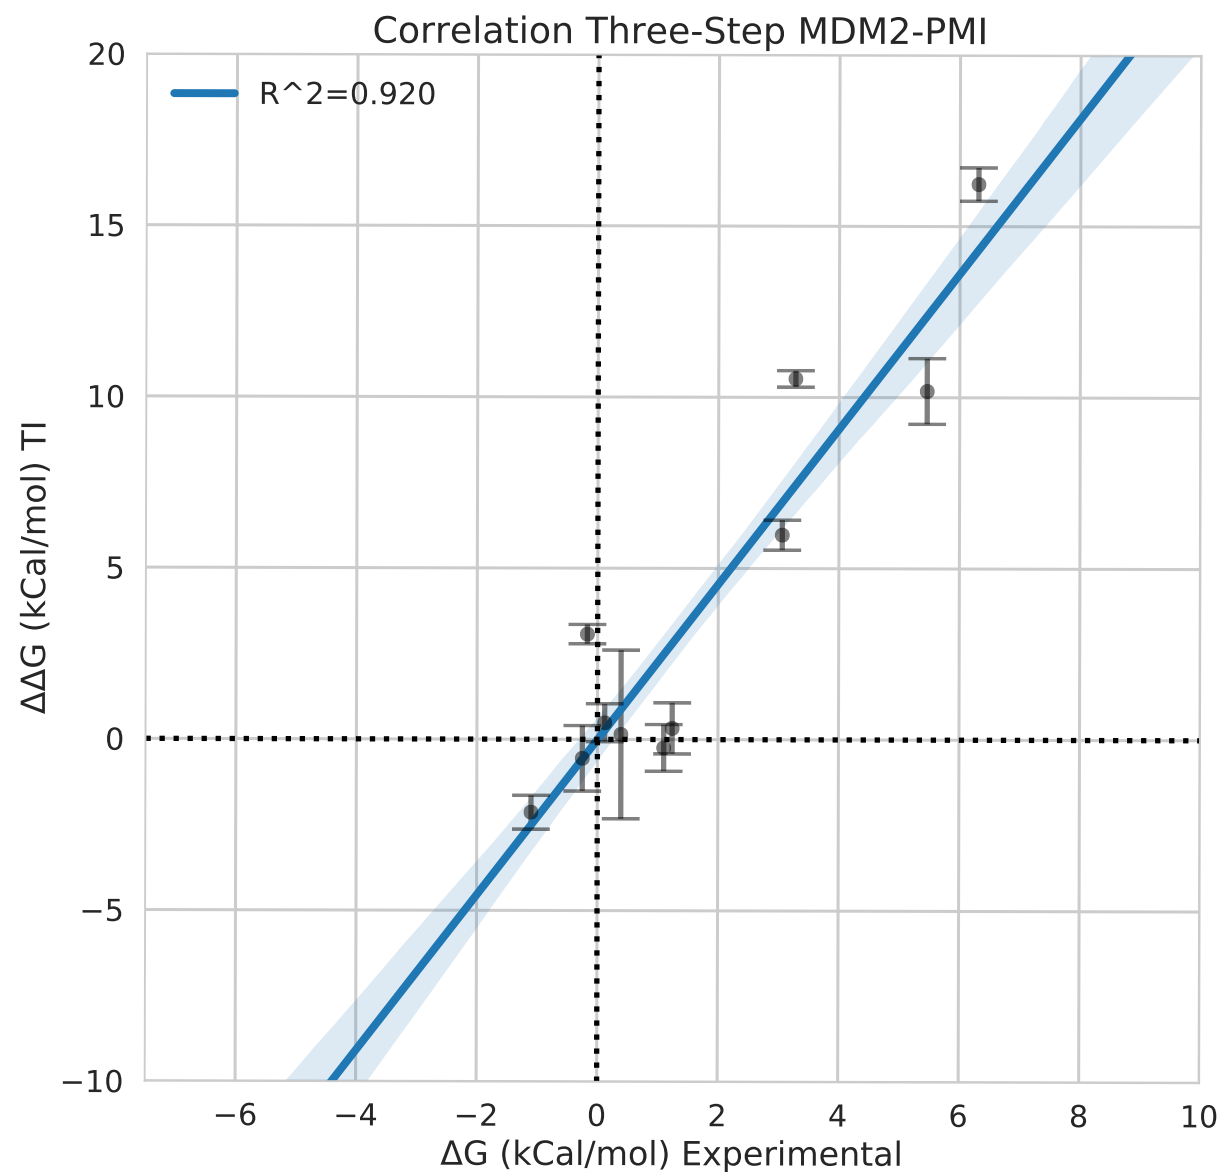

Supplement: NIHMS1688943-supplement-Supplemental_figure_S3.pdf [file NIHMS1688943-supplement-Supplemental_figure_S3.pdf]
